# Supplementary material for: Community perceptions on demand-side incentives to promote institutional delivery in Oyam district, Uganda: a qualitative study
Source: PubMed Central journal article supplement — BMJ Open. 2019 Sep 8;9(9):e026851. doi: 10.1136/bmjopen-2018-026851 (PMC6738676; doi:10.1136/bmjopen-2018-026851), 2019-09-08
Supplement: bmjopen-2018-026851supp001.pdf [file bmjopen-2018-026851supp001.pdf]

## **Questionnaire for Focus Group Discussions and Key Informants Interviews CUAMM Incentives Study, Oyam District**

**\*Notes for interviewers**

**NB: Please go through the brief notes for interviewers below (page 2) before starting discussions or interviews**

**Q1. What can you tell us (your general impression) about the Baby kits and Transport vouchers that CUAMM implemented in ACABA and NGAI Sub-counties?**

- \*-explore how they got to know (information) about the interventions, if not covered
- \*-find out the benefits of the interventions (baby kits and transport vouchers), if not covered
- \*-watch for non-verbal clues (signs) and make notes

**Q2. What do you think were some of the challenges or problems with the interventions?**

- \*-explore for baby kits, if not covered
- \*-explore for transport vouchers, if not covered
- \*-explore for any other issues
- \*-watch for non-verbal clues (signs) and make notes

**Q3. Please feel free to tell us how we can improve these interventions in the future, considering the challenges or problems that you mentioned.**

- \*-let them make recommendations or suggestions for improving the interventions
- \*-watch for non-verbal clues (signs) and make notes

**Q4. We implemented (gave out) the baby kits and transport vouchers in 2 of the 12 sub-counties in the district because of limited resources. If more resources become available in future, how many sub-counties should we consider for scaling up the interventions?**

- \*-watch for non-verbal clues (signs) and make notes

**Q5. What are your reasons for your answer to Q4?**

- \*-explore the reasons; 1 to a maximum of 5 reasons should be fine,

THANK YOU VERY MUCH FOR YOUR INPUTS AND TIME!

## **\*\*Brief guiding points for interviewers**

- ✚ Greet participants and make them comfortable,
- ✚ Introduce yourself,
- ✚ Introduce the purpose of the discussion or interview,
- ✚ Tell them it is **anonymous** (private and confidential)-no personal information will be collected or used to identify them,
- ✚ Tell them about a small incentive (e.g. a transport refund) at the end of the discussion/interview,
- ✚ Introduce the **INFORMED CONSENT FORM AND EXPLAIN CLEARLY, its purpose. If they voluntarily accept to participate then**
- ✚ Kindly ask them to sign or thumbprint (depending on which is applicable) and give them copies to keep,
- ✚ Kindly request their permission to record (take notes), especially if you are using a recorder,
- ✚ **NB: NO INTERVIEW OR DISCUSSION WITHOUT OBTAINING INFORMED CONSENT FIRST,**
- ✚ **For the FGDs the team may consist of three people, i.e. a moderator, a translator and a note taker (recorder),**
- ✚ **The FGDs could last for about one and half to two hours,**
- ✚ **For the Key Informant interviews, the team may include an interviewer, a translator and a note taker (recorder),**
- ✚ **The Key Informant interviews could take about 30-40 minutes to complete,**
- ✚ **Thank participant(s) at the end of the discussion or interview,**
- ✚ **Remember to leave your contact mobile phone number(s), in case it becomes necessary for them to contact you for further information.**

### **Sources:**

- 1) The Focus Group Manual  
(<http://apps.who.int/iris/bitstream/10665/41795/1/0963552228.pdf>)
- 2) Key Informant Guide ([www.TexasMotherFriendly.org](http://www.TexasMotherFriendly.org))
- 3) Guidelines for conducting a Focus Group  
([https://assessment.trinity.duke.edu/documents/How\\_to\\_Conduct\\_a\\_Focus\\_Group.pdf](https://assessment.trinity.duke.edu/documents/How_to_Conduct_a_Focus_Group.pdf))
